# Supplementary material for: An open protocol for modeling T Cell Clonotype repertoires using TCRβ CDR3 sequences
Source: PubMed Central journal article supplement (PMC10291816; doi:10.1186/s12864-023-09424-z), 2023-06-26
Supplement: 12864_2023_9424_MOESM2_ESM.pdf [file 12864_2023_9424_MOESM2_ESM.pdf]

## Supplementary Appendix 1

Suppose that we have three equimolar spike-in only datasets with possibly different concentrations consisting of 20, 10 and 10 replicate libraries, respectively. Denote their ST counts by  $\{C_{ij}^{(k)}: i = 1, \dots, 260, j = 1, \dots, n^{(k)}\}$ , where  $i = 1, \dots, 260$  labels ST,  $j = 1, \dots, n^{(k)}$  labels replicate libraries within datasets,  $k = 1, 2, 3$ , and  $n^{(1)} = 20$ ,  $n^{(2)} = n^{(3)} = 10$ .

Our basic assumption is that for any given ST (i.e. primer-pair) the expected values of the counts for are essentially the same, i.e. that we have

$$E(C_{ij}^{(k)}) = c^{(k)}m_i, i = 1, \dots, 260, j = 1, \dots, n^{(k)}, k = 1, 2, 3,$$

up to the concentrations  $c^{(1)}, c^{(2)}$ , and  $c^{(3)}$ . Within dataset  $k$ , natural unbiased estimates of the  $c^{(k)}m_i$  are the averages  $C_{i\bullet}^{(k)} = (n^{(k)})^{-1}C_{i+}^{(k)}$ , where  $C_{i+}^{(k)} = \sum_{j=1}^{n^{(k)}} C_{ij}^{(k)}$ .

These are maximum likelihood estimates (MLE) under the assumption that all the counts are mutually independent Poisson or Negative Binomial random variables with a common overdispersion parameter for each ST. Our goal here is to show how to combine the three estimates of  $m_i$  for any given  $i$  taking into account the possibly different concentrations. Without loss of generality we can take  $c^{(1)} = 1$ , and we will write  $c^{(2)} = c$  and  $c^{(3)} = d$ . Here are two approaches to combining the estimates.

**Assuming independent Poisson or Negative Binomial distributions.** In this case it is a straightforward calculation to show that the MLE of  $\mu_i$  based on all the counts is

$$\hat{m}_i = (n^*)^{-1}C_{i+}^{(+)} \text{ where } n^* = 20 + 10 \frac{C_{++}^{(2)}}{C_{++}^{(1)}} + 10 \frac{C_{++}^{(3)}}{C_{++}^{(1)}}.$$

This makes sense. We sum *all* the counts observed for ST  $i$  and divide that by the sum of the effective number of replicates in each dataset, relative to the concentration for dataset 1.

**Avoiding strong independence and distributional assumptions.** Here we begin by noting that  $\log E(C_{i\bullet}^{(k)}) = \log c^{(k)} + \log m_i$ ,  $i = 1, \dots, 260, k = 1, 2, 3$  and make our goal the linear combination of the three approximately unbiased estimates of  $\mu_i = \log m_i$ , namely the quantities  $l_i^{(k)} = \log C_{i\bullet}^{(k)}$ ,  $k = 1, 2, 3$ , correcting for the two offsets  $\gamma = \log c$  and  $\delta = \log d$  of the second and third datasets relative to the first, and taking into account the fact that the first dataset has twice their number of observations. A straightforward weighted least squares estimation process leads to the combined estimate of  $\mu_i$  as

$$\tilde{\mu}_i = \frac{1}{4}[2l_i^{(1)} + (l_i^{(2)} - \tilde{\gamma}) + (l_i^{(3)} - \tilde{\delta})]$$

where  $\tilde{\gamma} = \frac{1}{260}(l_{+}^{(2)} - l_{+}^{(1)})$  and  $\tilde{\delta} = \frac{1}{260}(l_{+}^{(3)} - l_{+}^{(1)})$ . Once we have a combined estimate of  $\mu_i = \log m_i$ , we antilog to obtain our estimate  $\tilde{m}_i$  of  $m_i$ .

Although the individual ST counts were plausibly negative binomial, they seemed far from independent. As a result, we used the second method to combine the three

sets of estimated count means. Recall that in practice, all we need are the estimates of ratios  $m_i/m_{\cdot}$ , so that the concentration terms cancel.
