# Supplementary material for: An open protocol for modeling T Cell Clonotype repertoires using TCRβ CDR3 sequences
Source: PubMed Central journal article supplement (PMC10291816; doi:10.1186/s12864-023-09424-z), 2023-06-26
Supplement: 12864_2023_9424_MOESM3_ESM.pdf [file 12864_2023_9424_MOESM3_ESM.pdf]

## Supplementary Appendix 2

Let  $C_i$  be the count for spike (primer-pair)  $i$ ,  $i=1, \dots, n=260$ . Our basic assumption is that the  $\{C_i\}$  are mutually independent, with  $C_i \sim NB(m_i, d_i)$ . Thus  $E(C_i) = m_i$  and  $Variance(C_i) = V(C_i) = m_i + d_i m_i^2$ . For the moment, we assume that the parameters  $\{m_i, d_i : i = 1, \dots, n\}$  are all known, with  $m_\bullet$  and  $d_\bullet$  being the average of the  $\{m_i\}$  and  $\{d_i\}$  respectively.

The normalized counts are  $N_i = \left(\frac{m_\bullet}{m_i}\right) C_i$ . Clearly  $E(N_i) = m_i$  for all  $i$ , i.e. the normalized values have the same expected value as the original counts. How variable are they?

Their average is  $N_\bullet$  and their empirical variance is  $s^2 = (n-1)^{-1} \sum (N_i - N_\bullet)^2$ .

We give a lower bound to the expected value of  $s^2$ , which implies that we cannot use normalization to produce values that are guaranteed to be arbitrarily close together.

**Assertion.**  $E(N_\bullet) = m_\bullet$ ,  $E(s^2) \geq m_\bullet + d_\bullet m_\bullet^2$ .

**Note.** The last expression is the variance of an  $NB(m_\bullet, d_\bullet)$ .

**Proof.** The equality  $E(N_\bullet) = m_\bullet$  follows by averaging both sides of  $E(N_i) = m_i$ .

Now  $V(N_i) = \left(\frac{m_\bullet}{m_i}\right)^2 V(C_i) = \frac{m_\bullet^2}{m_i} + d_i m_\bullet^2$ , while

$$V(N_\bullet) = n^{-2} \sum V(N_i) = n^{-2} \sum \left( \frac{m_\bullet^2}{m_i} + d_i m_\bullet^2 \right) = n^{-1} m_\bullet^2 \left\{ n^{-1} \sum \left( \frac{1}{m_i} \right) + d_\bullet \right\}.$$

The *harmonic mean* of the  $\{m_i\}$  is  $H = n / \sum \left( \frac{1}{m_i} \right)$ , and so  $H^{-1} = n^{-1} \sum \left( \frac{1}{m_i} \right)$ , and we can write  $nV(N_\bullet) = m_\bullet^2 (H^{-1} + d_\bullet)$ .

We now expand  $\sum (N_i - N_\bullet)^2$  in a familiar way as

$$\sum (N_i - N_\bullet)^2 = \sum ((N_i - m_\bullet) - (N_\bullet - m_\bullet))^2 = \sum (N_i - m_\bullet)^2 - n(N_\bullet - m_\bullet)^2$$

as the cross term vanishes. Taking  $E$  of both sides, we get

$$E \sum (N_i - N_\bullet)^2 = \sum V(N_i) - nV(N_\bullet).$$

The rest is algebra. The right-hand side above is

$$\sum V(N_i) - nV(N_\bullet) = \sum \left( \frac{m_\bullet^2}{m_i} + d_i m_\bullet^2 \right) - m_\bullet^2 (H^{-1} + d_\bullet) = m_\bullet^2 (n-1)(H^{-1} + d_\bullet).$$

Hence  $E\{(n-1)^{-1} \sum (N_i - N_\bullet)^2\} = m_\bullet^2 (H^{-1} + d_\bullet) \geq m_\bullet + d_\bullet m_\bullet^2$ , since  $m_\bullet \geq H$ ,

with equality if and only if the  $\{m_i\}$  are all equal.
